# Supplementary material for: GC-MS-Based Metabolomics Study of Single- and Dual-Species Biofilms of Candida albicans and Klebsiella pneumoniae
Source: PubMed Central journal article supplement (PMC8037927; doi:10.3390/ijms22073496), 2021-03-28
Supplement: ijms-22-03496-s001.pdf [file ijms-22-03496-s001.pdf]

Supplementary Materials

# GC-MS based metabolomics study of single and dual-species biofilms of *Candida albicans* and *Klebsiella pneumoniae*

Emilia Galdiero <sup>1</sup>, Maria Michela Salvatore <sup>2,\*</sup>, Angela Maione <sup>1</sup>, Elisabetta de Alteriis <sup>1</sup>, Anna Andolfi <sup>2,3</sup>, Francesco Salvatore <sup>2</sup>, Marco Guida <sup>1</sup>.

<sup>1</sup> Department of Biology, University of Naples 'Federico II', via Cinthia, 80126, Naples, Italy; egaldier@unina.it (E.G.); angela.maione@unina.it (A.M.); dealteri@unina.it (E.d.A.); marco.guida@unina.it (M.G.)

<sup>2</sup> Department of Chemical Sciences, University of Naples 'Federico II', via Cinthia, 80126 Naples, Italy; andolfi@unina.it (A.A.); frsalvat@unina.it (F.S.)

<sup>3</sup> BAT Center—Interuniversity Center for Studies on Bioinspired Agro-Environmental Technology, University of Naples 'Federico II', Portici, 80055 Naples, Italy

\*Correspondence: mariamichela.salvatore@unina.it; Tel.: +39-081674372

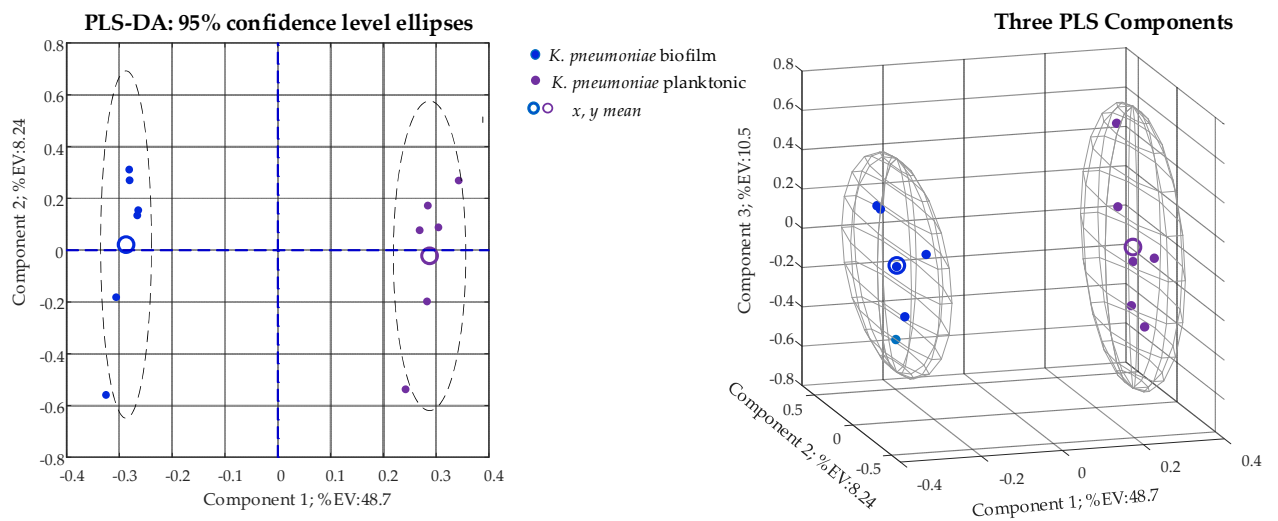

**Figure S1.** Partial least-squares discriminant analysis (PLS-DA) score plots obtained from comparison of *K. pneumoniae* biofilm and planktonic classes.

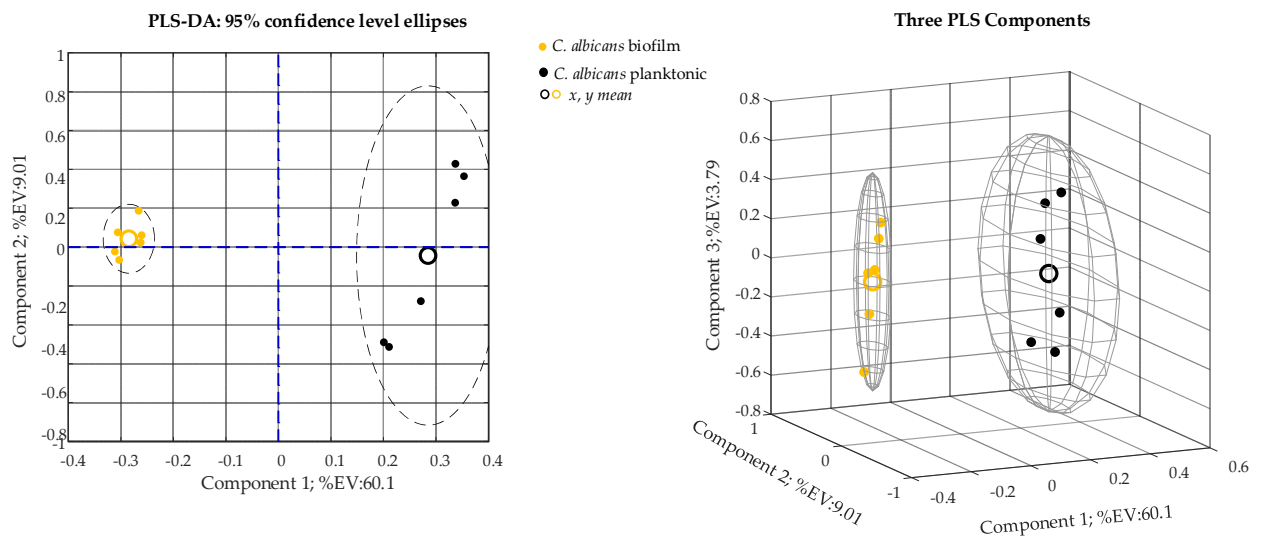

**Figure S2.** Partial least-squares discriminant analysis (PLS-DA) score plots obtained from comparison of *C. albicans* biofilm and planktonic classes.

**Table S1.** Identified metabolites from metabolomic analysis of planktonic and biofilm cultures of *C. albicans* and *K. pneumoniae*. Arrows indicate the direction (trend) of fold change comparing the two classes: (↑), up-regulated in biofilm culture; (↓), down-regulated in biofilm culture; (=) no statistically significant change; (–) indicates that the metabolite is not conserved in the two compared classes. RI represents Kovats retention index and TMS is the trimethylsilyl function, (CH<sub>3</sub>)<sub>3</sub>Si-.

| Name                                                              | <i>K. pneumoniae</i> biofilm vs planktonic cultures |                          |             | <i>C. albicans</i> biofilm vs planktonic cultures |                          |             |
|-------------------------------------------------------------------|-----------------------------------------------------|--------------------------|-------------|---------------------------------------------------|--------------------------|-------------|
|                                                                   | VIP score                                           | <i>t</i> -test 'p-value' | Fold change | VIP score                                         | <i>t</i> -test 'p-value' | Fold change |
| 3-Deoxy-D-arabino-hexonic acid $\gamma$ -lactone, 3TMS (RI: 1797) | 1.412                                               | 6.73 × 10 <sup>-9</sup>  | ↓ 2.05      | 1.01                                              | 2.99 × 10 <sup>-3</sup>  | ↑ 2.17      |
| Acetamide, N,N-diethyl- (RI: 1045)                                |                                                     | –                        |             | 0.64                                              | 1.06 × 10 <sup>-1</sup>  | = 2.64      |
| Alanine, 2TMS (RI: 1124)                                          | 1.169                                               | 1.39 × 10 <sup>-3</sup>  | ↑ 1.39      | 1.16                                              | 8.17 × 10 <sup>-5</sup>  | ↑ 1.91      |
| Arabitol, 5TMS (RI: 1750)                                         |                                                     | –                        |             | 1.01                                              | 2.70 × 10 <sup>-3</sup>  | ↓ 1.75      |
| Asparagine, 3TMS (RI: 1687)                                       | 1.335                                               | 1.11 × 10 <sup>-5</sup>  | ↑ 22.97     | 0.96                                              | 6.73 × 10 <sup>-3</sup>  | =1.94       |
| Aspartic acid, 3TMS (RI: 1540)                                    | 0.799                                               | 6.89 × 10 <sup>-2</sup>  | = 1.42      |                                                   | –                        |             |
| Beta-Lactic acid, 2TMS (RI: 1156)                                 |                                                     | –                        |             | 0.92                                              | 9.60 × 10 <sup>-3</sup>  | = 1.94      |
| Butanoic acid, 3TMS (RI: 1425)                                    | 0.461                                               | 3.09 × 10 <sup>-1</sup>  | = 1.49      | 0.66                                              | 9.82 × 10 <sup>-2</sup>  | = 1.63      |
| Citric acid, 4TMS (RI: 1844)                                      | 0.883                                               | 3.67 × 10 <sup>-2</sup>  | = 1.88      | 0.51                                              | 2.72 × 10 <sup>-1</sup>  | = 1.45      |
| Cyclo-(Phe-pro) (RI: 2434)                                        | 1.264                                               | 1.55 × 10 <sup>-4</sup>  | ↓ 2.34      | 1.01                                              | 2.66 × 10 <sup>-3</sup>  | ↑ 1.76      |
| Glutamic acid, 3TMS (RI: 1638)                                    | 1.282                                               | 8.90 × 10 <sup>-5</sup>  | ↓ 1.40      | 1.21                                              | 1.07 × 10 <sup>-5</sup>  | ↑ 2.17      |
| Glyceric acid, 3TMS (RI: 1346)                                    | 1.409                                               | 1.32 × 10 <sup>-8</sup>  | ↑ 10.72     | 1.12                                              | 3.05 × 10 <sup>-4</sup>  | ↑ 2.58      |
| Glycerol, 3TMS (RI: 1290)                                         |                                                     | –                        |             | 0.84                                              | 2.30 × 10 <sup>-2</sup>  | = 1.47      |
| Glycine, 2TMS (RI: 1136)                                          | 0.832                                               | 4.87 × 10 <sup>-2</sup>  | = 1.42      | 1.25                                              | 2.98 × 10 <sup>-7</sup>  | ↑ 2.48      |
| Glycolic acid, 2TMS (RI: 1100)                                    | 1.373                                               | 1.08 × 10 <sup>-6</sup>  | ↓ 3.75      | 1.07                                              | 1.23 × 10 <sup>-3</sup>  | ↑ 2.17      |
| Isoleucine, 2TMS (RI: 1307)                                       | 1.184                                               | 9.65 × 10 <sup>-4</sup>  | ↓ 1.60      | 1.23                                              | 4.27 × 10 <sup>-6</sup>  | ↑ 1.99      |
| Lactic acid, 2TMS (RI: 1083)                                      | 1.006                                               | 1.11 × 10 <sup>-2</sup>  | ↑ 122.93    | 0.63                                              | 1.27 × 10 <sup>-1</sup>  | = 1.36      |
| Leucine, 2TMS (RI: 1286)                                          |                                                     | –                        |             | 1.16                                              | 8.84 × 10 <sup>-5</sup>  | ↑ 3.62      |
| Lysine, 3TMS (RI: 1722)                                           | 0.383                                               | 4.07 × 10 <sup>-1</sup>  | = 1.07      | 1.13                                              | 2.33 × 10 <sup>-4</sup>  | ↑ 3.67      |
| Methionine, 3TMS (RI: 1536)                                       | 0.577                                               | 2.33 × 10 <sup>-1</sup>  | = 1.03      | 1.25                                              | 3.51 × 10 <sup>-7</sup>  | ↑ 1.50      |
| Mevalonic acid, 3 TMS (1574)                                      | 1.430                                               | 1.39 × 10 <sup>-12</sup> | ↓ 59.72     |                                                   | –                        |             |
| Nicotinic acid TMS (RI: 1304)                                     | 1.395                                               | 1.22 × 10 <sup>-7</sup>  | ↓ 2.01      | 1.23                                              | 2.03 × 10 <sup>-6</sup>  | ↑ 1.71      |
| Ornithine, 3TMS (RI: 1632)                                        | 1.149                                               | 1.85 × 10 <sup>-3</sup>  | ↓ 2.02      |                                                   | –                        |             |
| Phenylalanine, 2TMS (RI: 1647)                                    | 1.365                                               | 1.88 × 10 <sup>-6</sup>  | ↓ 1.35      | 1.06                                              | 1.09 × 10 <sup>-3</sup>  | ↑ 1.91      |
| Phosphate, 3TMS (RI: 1297)                                        | 0.920                                               | 2.63 × 10 <sup>-2</sup>  | = 1.65      | 1.04                                              | 4.28 × 10 <sup>-3</sup>  | ↑ 716.79    |
| Piperidine-2-carboxylic acid, 2TMS (RI: 1624)                     | 1.366                                               | 1.69 × 10 <sup>-6</sup>  | ↓ 1.77      | 1.19                                              | 2.38 × 10 <sup>-5</sup>  | ↑ 2.24      |
| Proline, 2TMS (RI: 1314)                                          | 0.420                                               | 3.72 × 10 <sup>-1</sup>  | = 1.74      | 1.26                                              | 6.77 × 10 <sup>-8</sup>  | ↑ 39.10     |
| Propanoic acid, 2methyl-2,3bishydroxy, 3TMS (RI: 1336)            | 0.923                                               | 2.84 × 10 <sup>-2</sup>  | = 3.14      | 1.18                                              | 3.96 × 10 <sup>-5</sup>  | ↑ 5.51      |
| Pyroglutamic acid, 2TMS (RI: 1546)                                | 1.085                                               | 4.49 × 10 <sup>-3</sup>  | ↓ 1.24      | 0.43                                              | 4.00 × 10 <sup>-1</sup>  | ↑ 1.22      |
| Pyruvic acid, 2TMS (RI: 1108)                                     |                                                     | –                        |             | 0.88                                              | 2.69 × 10 <sup>-2</sup>  | = 2.04      |
| Shikimic acid, 4TMS (RI: 1951)                                    | 0.843                                               | 4.92 × 10 <sup>-2</sup>  | ↑ 3.08      |                                                   | –                        |             |
| Serine, 3TMS (RI: 1375)                                           |                                                     | –                        |             | 1.20                                              | 1.11 × 10 <sup>-5</sup>  | ↑ 1.50      |
| Succinic acid, 2TMS (RI: 1322)                                    | 1.431                                               | 5.45 × 10 <sup>-13</sup> | ↓ 16.68     | 1.09                                              | 7.00 × 10 <sup>-4</sup>  | ↑ 1.50      |
| Trehalose, 8TMS (RI: 2781)                                        |                                                     | –                        |             | 0.68                                              | 1.16 × 10 <sup>-1</sup>  | = 1.50      |
| Threonine, 3TMS (RI: 1400)                                        | 1.431                                               | 1.88 × 10 <sup>-12</sup> | ↑ 433.33    | 1.22                                              | 5.06 × 10 <sup>-6</sup>  | ↑ 2.16      |
| Tryptophan, 3TMS (RI: 2244)                                       | 1.264                                               | 1.61 × 10 <sup>-4</sup>  | ↓ 1.91      | 1.11                                              | 5.41 × 10 <sup>-4</sup>  | ↑ 2.40      |
| Tyrosine, 2TMS (RI: 1962)                                         | 0.500                                               | 2.70 × 10 <sup>-1</sup>  | = 1.35      | 0.97                                              | 5.85 × 10 <sup>-3</sup>  | = 1.92      |
| Uracil, 2TMS (RI: 1351)                                           | 1.186                                               | 9.10 × 10 <sup>-4</sup>  | ↓ 1.79      | 0.68                                              | 1.20 × 10 <sup>-1</sup>  | = 1.36      |
| Valine, 2TMS (RI: 1230)                                           | 1.262                                               | 1.66 × 10 <sup>-4</sup>  | ↓ 1.41      | 1.21                                              | 6.24 × 10 <sup>-6</sup>  | ↑ 2.18      |
| Vitamin B6, 3TMS (RI: 1924)                                       | 0.694                                               | 1.12 × 10 <sup>-1</sup>  | = 1.86      | 0.66                                              | 1.07 × 10 <sup>-1</sup>  | = 1.63      |

**Table S2.** Identified metabolites from metabolomic analysis of dual biofilm cultures of *C. albicans*/*K. pneumoniae* after 24 h of incubation compared with dual species biofilm after 48 h of incubation. Arrows indicate the direction (trend) of fold change comparing the two classes: (↑), up-regulated in dual species biofilm after an incubation period of 24 h; (↓), down-regulated in dual species biofilm after an incubation period of 24 h; (=) no statistically significant change. RI represents Kovats retention index and TMS is the trimethylsilyl function, (CH<sub>3</sub>)<sub>3</sub>Si.

| Name                                                              | Dual species 24 h vs 48 h |                                      |                |
|-------------------------------------------------------------------|---------------------------|--------------------------------------|----------------|
|                                                                   | VIP score                 | <i>t</i> -test<br>' <i>p</i> -value' | Fold<br>change |
| Acetamide, N,N-diethyl- (RI: 1045)                                | 1.226                     | 5.74 × 10 <sup>-4</sup>              | ↑ 3.10         |
| Adenine, TMS (RI: 1890)                                           | 1.430                     | 7.23 × 10 <sup>-9</sup>              | ↑ 13.28        |
| Alanine, 2TMS (RI: 1124)                                          | 1.126                     | 3.09 × 10 <sup>-3</sup>              | ↑ 1.27         |
| Arabitol, 5TMS (RI: 1750)                                         | 1.082                     | 5.46 × 10 <sup>-3</sup>              | ↓ 1.76         |
| Asparagine, 3TMS (RI: 1687)                                       | 0.700                     | 1.16 × 10 <sup>-1</sup>              | = 1.12         |
| Aspartic acid, 3TMS (RI: 1540)                                    | 1.123                     | 3.32 × 10 <sup>-3</sup>              | ↓ 1.41         |
| Beta-lactic acid, 2TMS (RI: 1156)                                 | 1.008                     | 1.23 × 10 <sup>-2</sup>              | ↓ 1.41         |
| Butanoic acid, 3TMS (RI: 1425)                                    | 0.294                     | 5.50 × 10 <sup>-1</sup>              | = 1.23         |
| Citric acid, 4TMS (RI: 1844)                                      | 0.493                     | 2.88 × 10 <sup>-1</sup>              | = 1.11         |
| Cyclo-(Phe-Pro) (RI: 2434)                                        | 1.376                     | 2.81 × 10 <sup>-6</sup>              | ↓ 4.50         |
| 3-Deoxy-D-arabino-hexonic acid $\gamma$ -lactone, 3TMS (RI: 1797) | 1.432                     | 4.64 × 10 <sup>-9</sup>              | ↑ 11.79        |
| Glutamic acid, 3TMS (RI: 1638)                                    | 1.186                     | 1.19 × 10 <sup>-3</sup>              | ↑ 1.22         |
| Glyceric acid, 3TMS (RI: 1346)                                    | 0.087                     | 9.75 × 10 <sup>-1</sup>              | = 1.00         |
| Glycerol, 3TMS (RI: 1290)                                         | 1.000                     | 1.34 × 10 <sup>-2</sup>              | = 1.42         |
| Glycine, 2TMS (RI: 1136)                                          | 0.455                     | 3.26 × 10 <sup>-1</sup>              | = 1.13         |
| Isoleucine, 2TMS (RI: 1307)                                       | 0.494                     | 2.79 × 10 <sup>-1</sup>              | = 1.81         |
| 2-Isopropyl-3-ketobutyrate, 2TMS (RI: 1463)                       | 1.451                     | 1.2 × 10 <sup>-16</sup>              | ↓ 15.21        |
| Leucine, 2TMS (RI: 1286)                                          | 0.498                     | 2.88 × 10 <sup>-1</sup>              | = 1.69         |
| Lysine, 3TMS (RI: 1722)                                           | 1.406                     | 2.52 × 10 <sup>-7</sup>              | ↑ 6.42         |
| Methionine, 2TMS (RI: 1536)                                       | 1.333                     | 2.51 × 10 <sup>-5</sup>              | ↑ 1.58         |
| 2-Methylglutaconic acid (3TMS) (RI: 1590)                         | 1.431                     | 5.66 × 10 <sup>-9</sup>              | ↓ 5.81         |
| Nicotinic acid, TMS (RI: 1304)                                    | 0.979                     | 1.62 × 10 <sup>-2</sup>              | = 1.17         |
| Ornithine, 3TMS (RI: 1632)                                        | 1.399                     | 4.85 × 10 <sup>-7</sup>              | ↑ 32.09        |
| Phenylalanine, 2TMS (RI: 1647)                                    | 1.031                     | 9.74 × 10 <sup>-3</sup>              | ↑ 1.15         |
| Phosphate, 3TMS (RI: 1297)                                        | 0.618                     | 1.74 × 10 <sup>-1</sup>              | = 1.20         |
| Piperidine-2-carboxylic acid (2TMS) (RI: 1624)                    | 0.569                     | 2.19 × 10 <sup>-1</sup>              | = 1.08         |
| Proline, 2TMS (RI: 1314)                                          | 1.122                     | 3.26 × 10 <sup>-3</sup>              | ↓ 3.48         |
| Propanoic acid, 2methyl-2,3bishidroxy, 3TMS (RI: 1336)            | 0.532                     | 2.48 × 10 <sup>-1</sup>              | = 1.58         |
| Pyroglutamic acid, 2TMS (RI: 1546)                                | 0.233                     | 6.43 × 10 <sup>-1</sup>              | = 1.10         |
| Pyruvic acid, 2TMS (RI: 1108)                                     | 0.281                     | 5.49 × 10 <sup>-1</sup>              | = 1.14         |
| Succinic acid, 2TMS (RI: 1322)                                    | 1.387                     | 1.41 × 10 <sup>-6</sup>              | ↓ 1.35         |
| Threonine, 3TMS (RI: 1400)                                        | 1.402                     | 3.97 × 10 <sup>-7</sup>              | ↓ 1.49         |
| Trehalose, 8TMS (RI: 2781)                                        | 1.199                     | 9.70 × 10 <sup>-4</sup>              | ↓ 3.08         |
| Tryptophan, 3TMS (RI: 2244)                                       | 1.388                     | 5.46 × 10 <sup>-6</sup>              | ↑ 4.37         |
| Tyrosine, 3TMS (RI: 1962)                                         | 1.384                     | 1.66 × 10 <sup>-6</sup>              | ↑ 2.12         |
| Uracil, 2TMS (RI: 1351)                                           | 0.890                     | 3.40 × 10 <sup>-2</sup>              | ↓ 1.37         |
| Valine, 2TMS (RI: 1230)                                           | 0.753                     | 8.75 × 10 <sup>-2</sup>              | ↑ 1.05         |
| Vitamin B6, 3TMS (RI: 1924)                                       | 1.246                     | 3.52 × 10 <sup>-4</sup>              | ↓ 4.35         |

**Table S3.** Additional information on metabolites identified in this work. MF represents the so-called Match Factor calculated by the dot-product function that measures the cosine of the angle between spectra represented as vectors. MF = 1000 correspond to a perfect match between a pair of compared spectra. RI<sub>exp</sub> and RI<sub>DB</sub> represent, respectively, Kovats programmed temperature retention indices evaluated in this work (on a 5% phenyl methyl poly siloxane) and gathered from literature and databases (for identical or similar) stationary phases. %ΔRI is the percent difference between experimental and literature RI values. TMS is the trimethylsilyl function, (CH<sub>3</sub>)<sub>3</sub>Si.

| Name                                              | MF  | RI <sub>exp</sub> (this work) | RI <sub>DB</sub> (literature) | %ΔRI  |
|---------------------------------------------------|-----|-------------------------------|-------------------------------|-------|
| Acetamide, N,N-diethyl-                           | 877 | 1045                          | –                             | –     |
| Adenine, TMS                                      | 896 | 1890                          | 1898                          | -0.42 |
| Alanine, 2TMS                                     | 891 | 1124                          | 1087                          | 3.29  |
| Arabitol, 5TMS                                    | 871 | 1750                          | 1760                          | -0.57 |
| Asparagine, 3TMS                                  | 899 | 1687                          | 1666                          | 1.24  |
| Aspartic acid, 3TMS                               | 852 | 1540                          | 1513                          | 1.75  |
| Beta-lactic acid, 2TMS                            | 754 | 1156                          | 1151                          | 0.43  |
| Butanoic acid, 3TMS                               | 805 | 1425                          | 1431                          | -0.42 |
| Citric acid, 4TMS                                 | 839 | 1844                          | 1839                          | 0.27  |
| Cyclo-(Phe-Pro)                                   | 808 | 2434                          | –                             | –     |
| 3-Deoxy-D-arabino-hexonic acid<br>γ-lactone, 3TMS | 934 | 1797                          | 1771                          | 1.45  |
| Glutamic acid, 3TMS                               | 890 | 1638                          | 1647                          | -0.55 |
| Glyceric acid, 3TMS                               | 899 | 1346                          | 1342                          | 0.30  |
| Glycerol, 3TMS                                    | 833 | 1290                          | 1292                          | -0.16 |
| Glycine, 2TMS                                     | 933 | 1136                          | 1111                          | 2.20  |
| Glycolic acid (2TMS)                              | 841 | 1100                          | 1078                          | 2.00  |
| Isoleucine, 2TMS                                  | 934 | 1307                          | 1300                          | 0.54  |
| 2-Isopropyl-3-ketobutyrate, 2TMS                  | 755 | 1463                          | –                             | –     |
| Lactic acid, 2TMS                                 | 960 | 1083                          | 1065                          | 1.66  |
| Leucine, 2TMS                                     | 763 | 1286                          | 1287                          | -0.08 |
| Lysine, 3TMS                                      | 947 | 1722                          | 1703                          | 1.10  |
| Methionine, 2TMS                                  | 905 | 1536                          | 1531                          | 0.33  |
| 2-Methylglutaconic acid, 3TMS                     | 774 | 1590                          | –                             | –     |
| Mevalonic acid, 3 TMS                             | 886 | 1574                          | 1572                          | 0.13  |
| Nicotinic acid, TMS                               | 841 | 1304                          | 1301                          | 0.23  |
| Ornithine, 3TMS                                   | 901 | 1632                          | 1612                          | 1.23  |
| Phenylalanine, 2TMS                               | 869 | 1647                          | 1629                          | 1.09  |
| Phosphate, 3TMS                                   | 717 | 1297                          | 1282                          | 1.16  |
| Piperidine-2-carboxylic acid, 2TMS                | 826 | 1624                          | 1505                          | 7.33  |
| Proline, 2TMS                                     | 885 | 1314                          | 1316                          | -0.15 |
| Propanoic acid, 2methyl-2,3bishidroxy, 3TMS       | 828 | 1336                          | 1348                          | -0.90 |
| Pyroglutamic acid, 2TMS                           | 910 | 1546                          | 1521                          | 1.62  |
| Pyruvic acid, 2TMS                                | 883 | 1108                          | 1090                          | 1.62  |
| Serine, 3TMS                                      | 893 | 1375                          | 1388                          | -0.95 |
| Shikimic acid, 4TMS                               | 899 | 1951                          | 1812                          | 7.12  |
| Succinic acid, 2TMS                               | 942 | 1322                          | 1318                          | 0.30  |
| Threonine, 3TMS                                   | 957 | 1400                          | 1377                          | 1.64  |

|                  |     |      |      |       |
|------------------|-----|------|------|-------|
| Trehalose, 8TMS  | 911 | 2781 | 2756 | 0.90  |
| Tryptophan, 3TMS | 945 | 2244 | 2218 | 1.16  |
| Tyrosine, 3TMS   | 933 | 1962 | 1960 | 0.10  |
| Uracil, 2TMS     | 758 | 1351 | 1346 | 0.37  |
| Valine, 2TMS     | 877 | 1230 | 1234 | -0.33 |
| Vitamin B6, 3TMS | 937 | 1924 | 1908 | 0.83  |
